# Supplementary material for: Selective synthesis of 4-hydroxyisophorone and 4-ketoisophorone by fungal peroxygenases
Source: Royal Society of Chemistry journal article supplement (doi:10.1039/c8cy02114g), 2019-01-01
Supplement: c8cy02114g1.pdf [file c8cy02114g1.pdf]

## Supporting Information

### Selective Synthesis of 4-Hydroxyisophorone and 4-Ketoisophorone by Fungal Peroxygenases

Carmen Aranda,<sup>a</sup> Martí Municoy,<sup>b</sup> Víctor Guallar,<sup>b,c</sup> Jan Kiebist,<sup>d</sup> Katrin Scheibner,<sup>d</sup> René Ullrich,<sup>e</sup> José C. del Río,<sup>a</sup> Martin Hofrichter,<sup>e</sup> Angel T. Martínez,<sup>\*f</sup> and Ana Gutiérrez,<sup>\*a</sup>

<sup>a</sup> *Instituto de Recursos Naturales y Agrobiología de Sevilla, CSIC, Reina Mercedes 10, E-41012 Seville, Spain. E-mail: mail: [anaqu@irnase.csic.es](mailto:anaqu@irnase.csic.es)*

<sup>b</sup> *Barcelona Supercomputing Center, Jordi Girona 31, E-08034, Barcelona, Spain.*

<sup>c</sup> *ICREA, Passeig Lluís Companys 23, E-08010, Barcelona, Spain.*

<sup>d</sup> *TU Dresden, Department of Bio- and Environmental Sciences, Markt 23, D-02763 Zittau, Germany*

<sup>e</sup> *JenaBios GmbH, Löbstedter Str. 80, D-07749 Jena, Germany*

<sup>f</sup> *Centro de Investigaciones Biológicas, CSIC, Ramiro de Maeztu 9, E-28040 Madrid, Spain. E-mail: [atmartinez@cib.csic.es](mailto:atmartinez@cib.csic.es)*

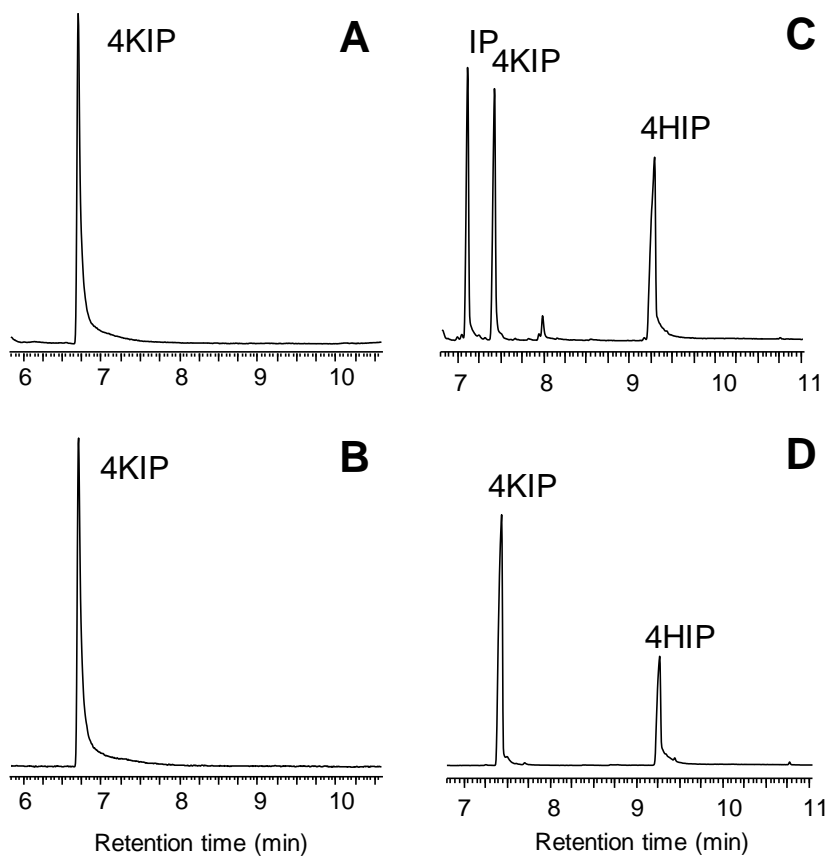

**Figure S1.** Comparison of GC-MS retention times of the products from isophorone (IP) reaction with *CglUPO* (A) and *rHinUPO* (C), compared with the corresponding 4KIP and 4HIP (from 4KIP chemical reduction) authentic standards (B and D).

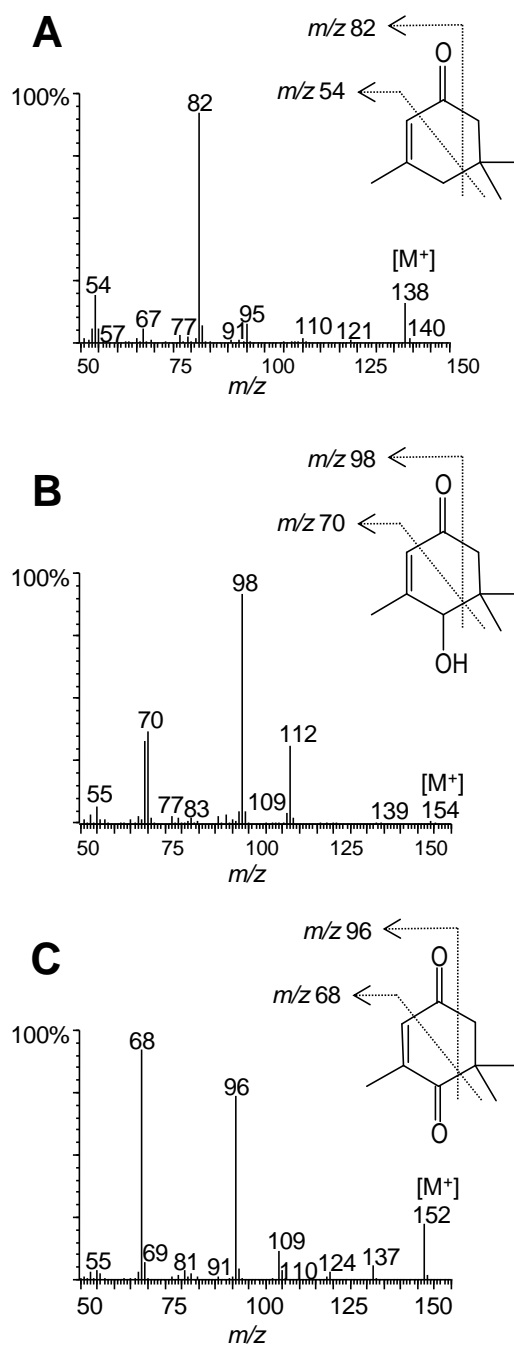

**Figure S2.** Mass spectra of isophorone (**A**) and the products from the enzymatic reaction with *Cg*/UPO, 4HIP (**B**) and 4KIP (**C**).

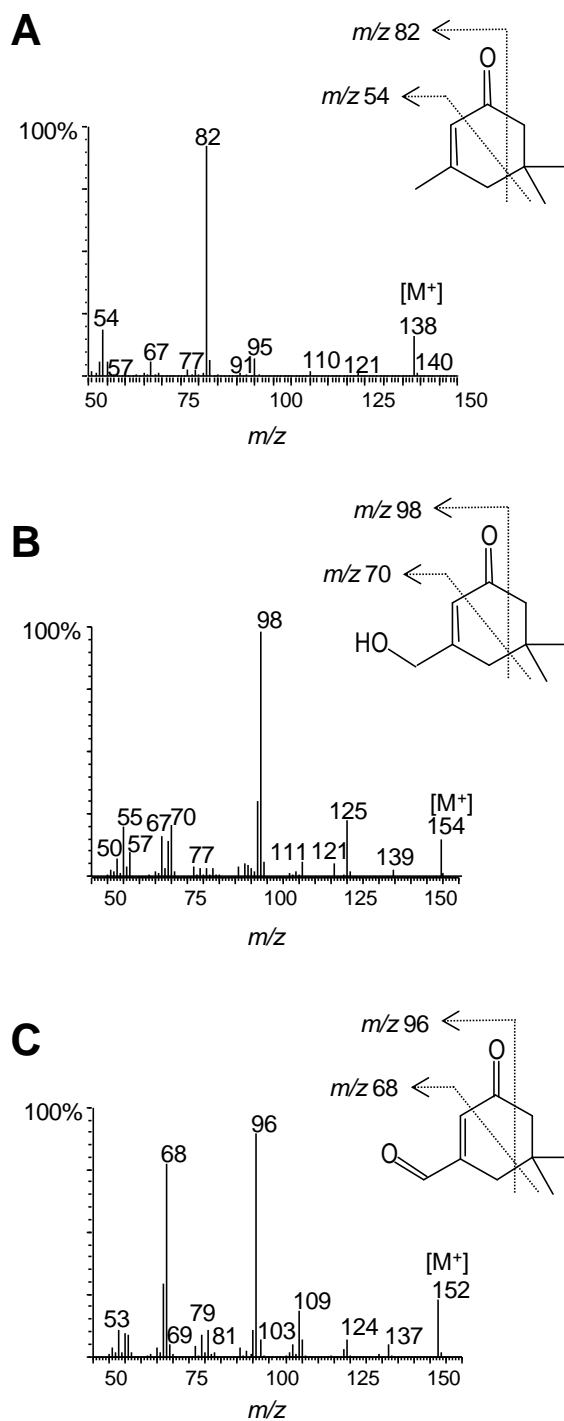

**Figure S3.** Mass spectra of isophorone (**A**) and the products from enzymatic reaction 7HIP (**B**) and 7FIP (**C**).

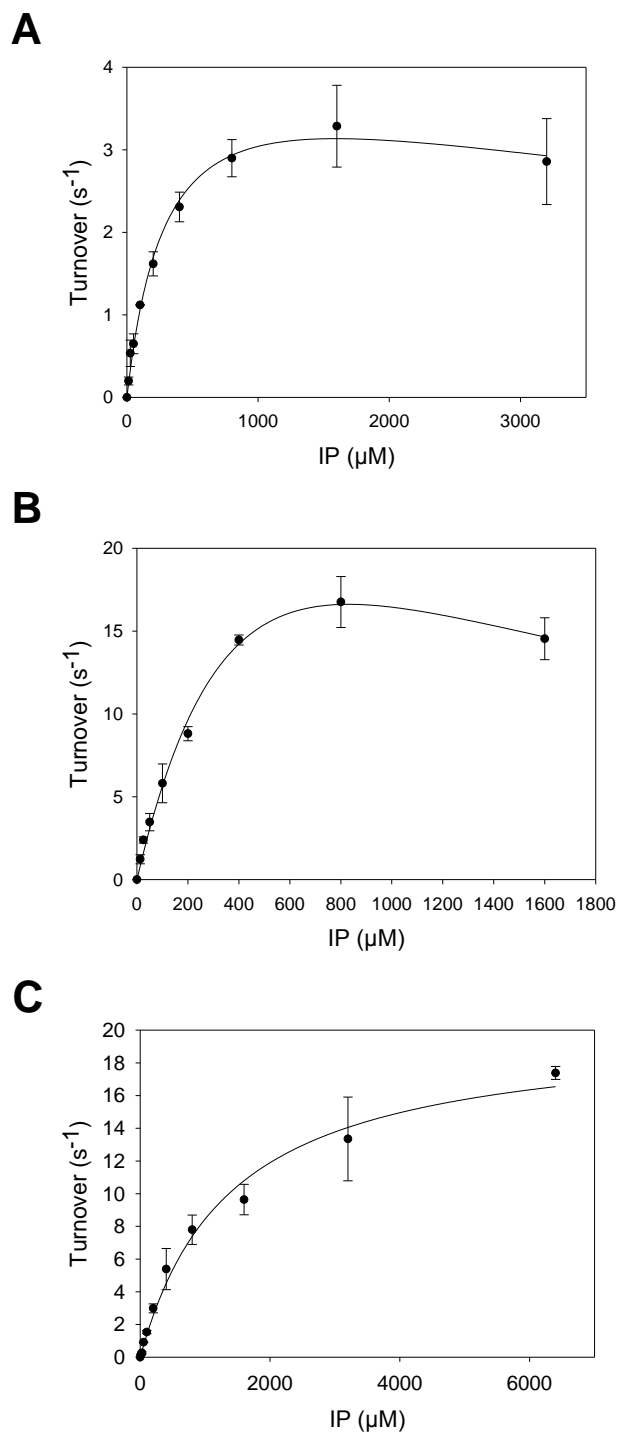

**Figure S4.** Kinetic curves of enzymatic hydroxylation of isophorone (IP) by *Cg/UPO* (A), *rHinUPO* (B) and *AaeUPO* (C) from GC-MS estimation of 4HIP/4KIP formation (initial rates), adjusted as described in Experimental.

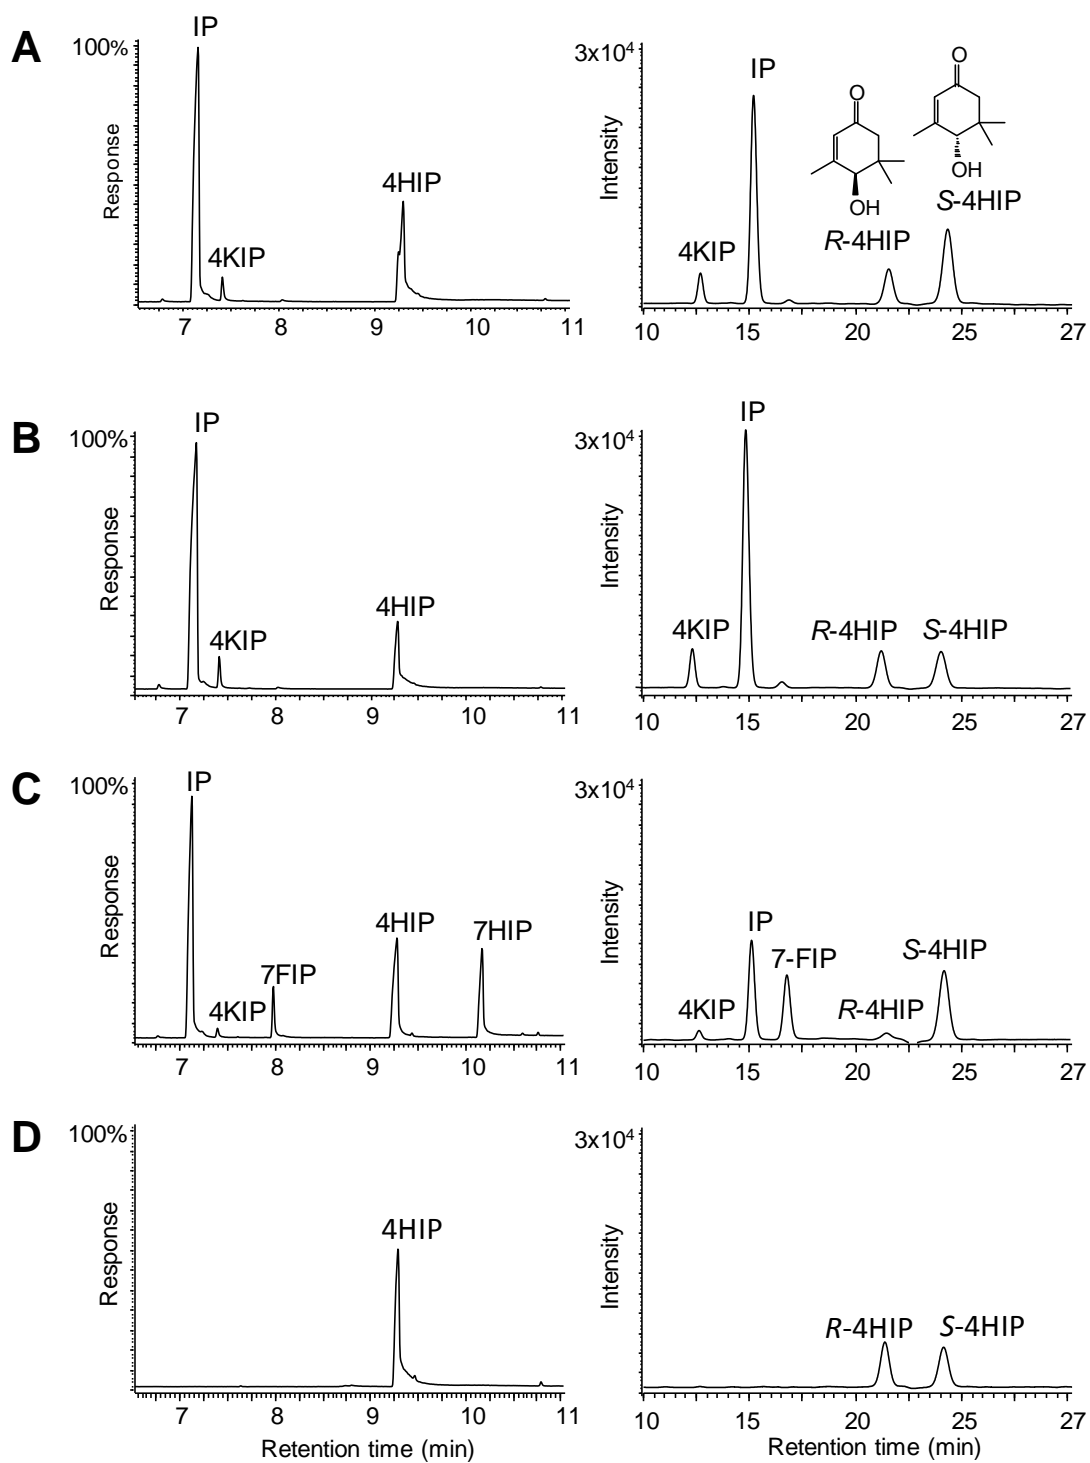

**Figure S5.** GC-MS (*left*) and chiral HPLC (*right*) analyses of isophorone (IP) hydroxylation by *CglUPO* (A), *rHinUPO* (B) and *AaeUPO* (C) and the chemical reduction of 4KIP (D), showing the *R*-4HIP, *S*-4HIP, 4KIP and 7FIP products.

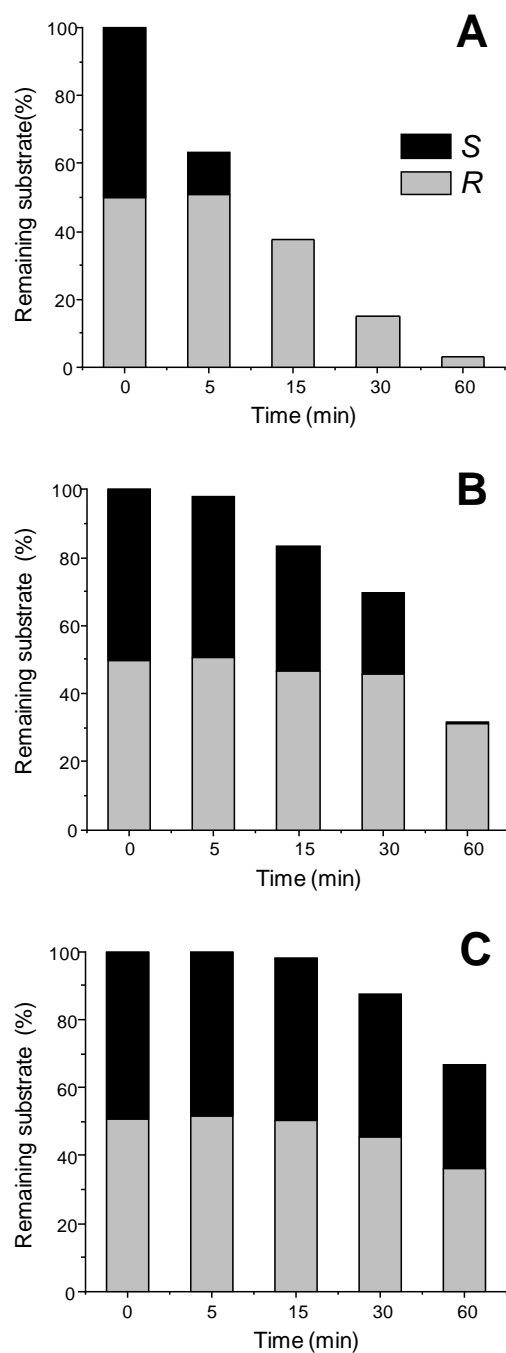

**Figure S6.** *R*-4HIP and *S*-4HIP enantiomers during reaction of 4-hydroxyisophorone (4-HIP) racemate with *rHinUPO* (A), *CglUPO* (B) and *AaeUPO* (C), in percentage (%) of the initial chiral substrate.

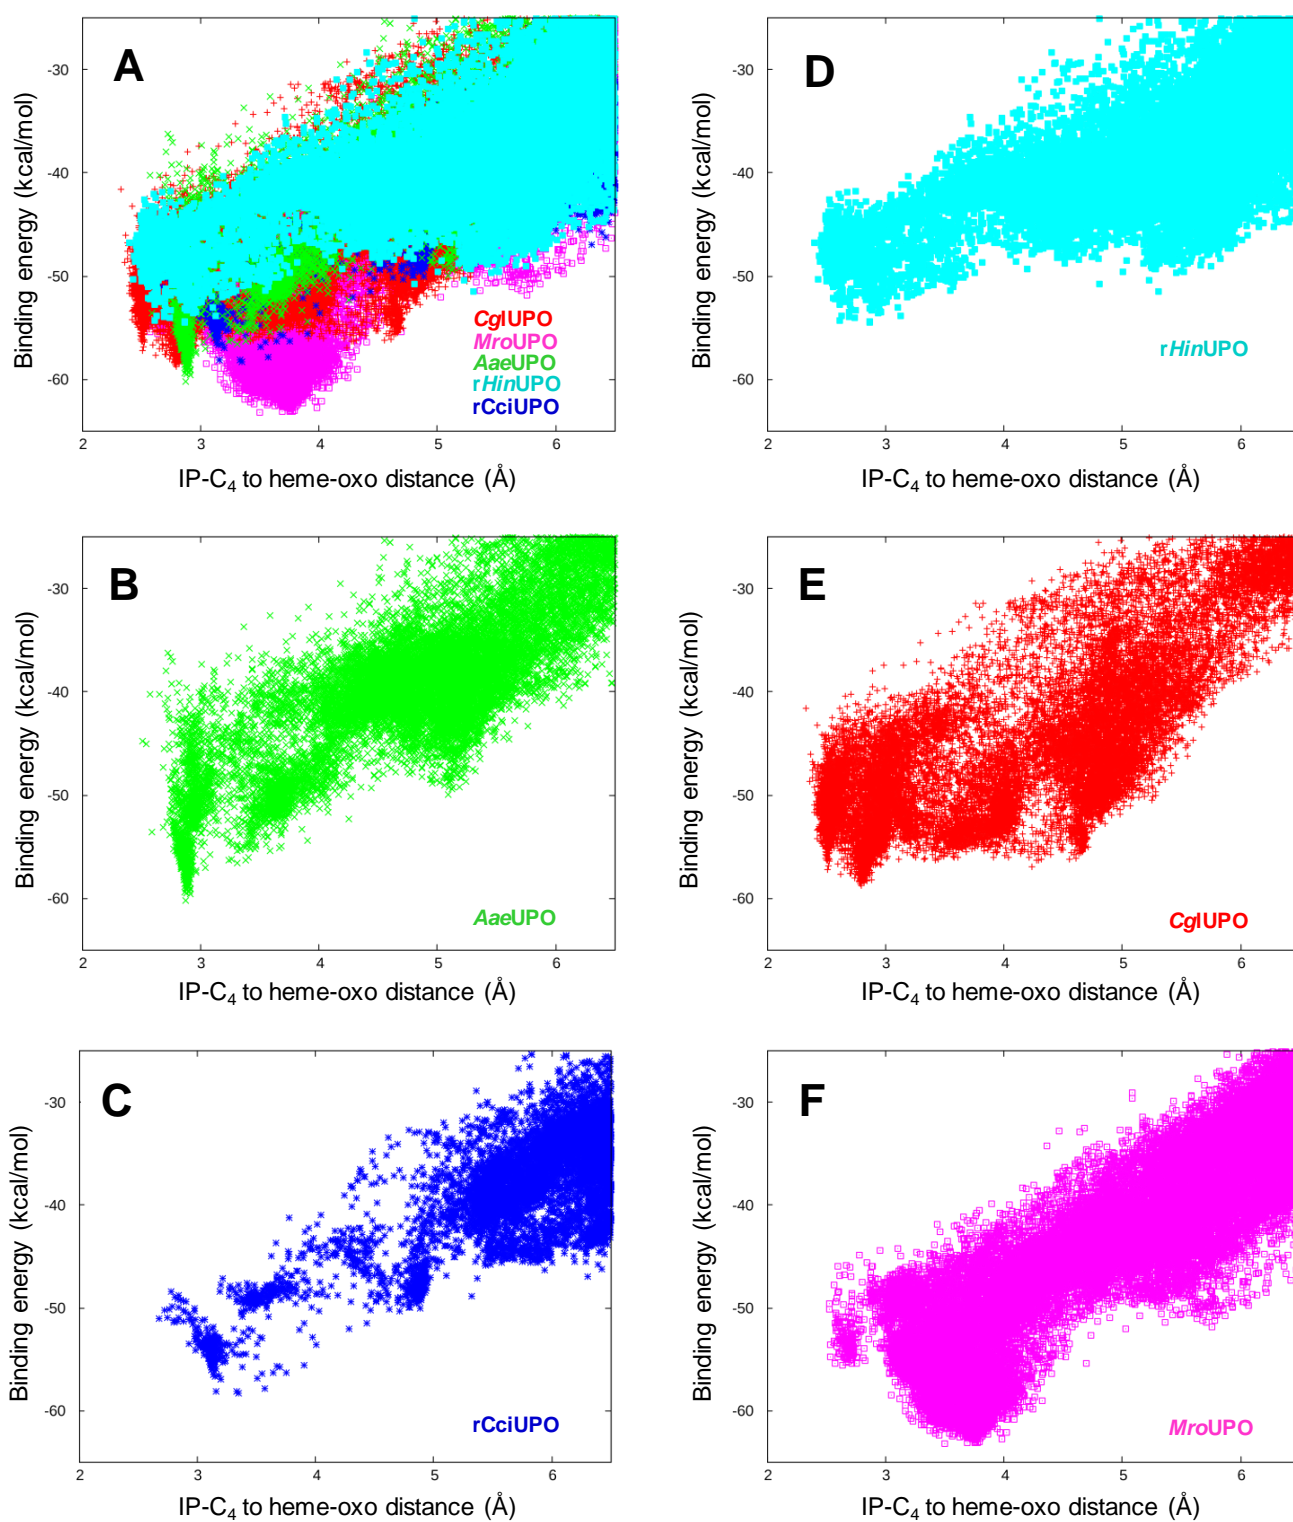

**Figure S7.** Individual PELE plots for isophorone (IP) diffusion in *AaeUPO* (B), *rCciUPO* (C), *rHinUPO* (D), *CglUPO* (E) and *MroUPO* (F) showing the C<sub>4</sub>-oxo distance vs the binding energy, compared with the overlapping plots shown in **Figure 4A** (A).



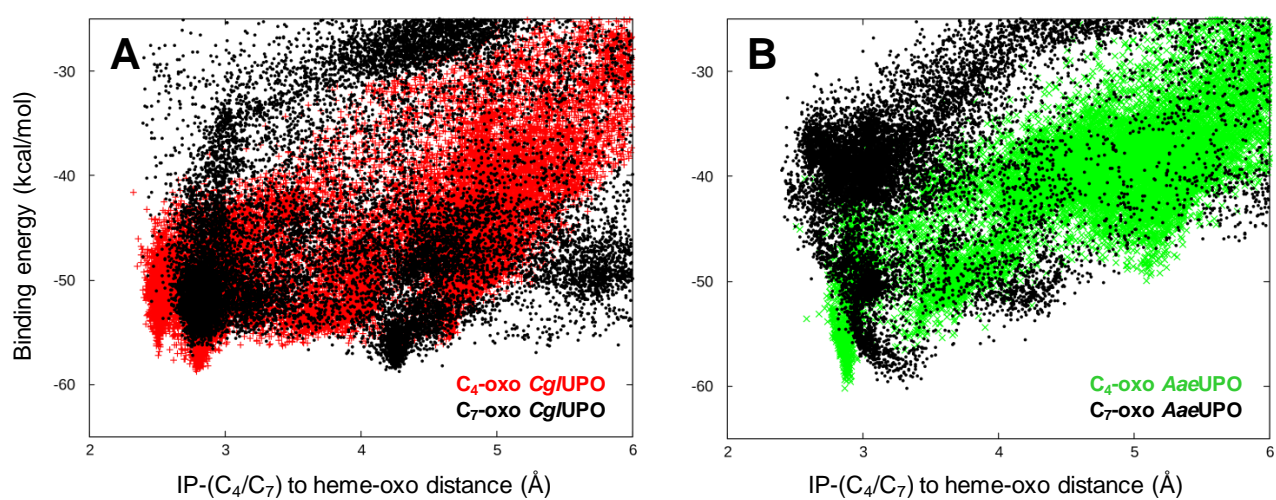

**Figure S8.** Comparison of C<sub>4</sub>- and C<sub>7</sub>-oxo distances vs binding energy during isophorone (IP) diffusion on Cg/UPO (A) and AaeUPO (B) using adaptive PELE.<sup>[41]</sup> For the same binding energy, the C<sub>7</sub> distances are always shown by black dots, while the C<sub>4</sub> distances for Cg/UPO and AaeUPO are shown by red and green dots, respectively.
